# Supplementary material for: Oxidation promoted self-assembly of π-conjugated polymers
Source: Royal Society of Chemistry journal article supplement (doi:10.1039/d0sc00806k), 2020-01-01
Supplement: d0sc00806k1.pdf [file d0sc00806k1.pdf]

Electronic Supporting Information

**Oxidation Promoted Self-Assembly of  $\pi$ -Conjugated Polymers**

*Garion E. J. Hicks, Charles N. Jarrett-Wilkins, Jenny R. Panchuk, Joseph G.  
Manion, and Dwight S. Seferos\**

Lash Miller Chemical Laboratories, Department of Chemistry, University of  
Toronto, 80 St. George Street, Toronto, Ontario, M5S 3H6, Canada

## Table of Contents

|                                                                                                                                          |     |
|------------------------------------------------------------------------------------------------------------------------------------------|-----|
| Figure S1. $^1\text{H}$ NMR spectrum of Thiophene Monomer .....                                                                          | S3  |
| Figure S2. $^1\text{H}$ NMR spectrum of Tellurophene Monomer .....                                                                       | S4  |
| Figure S3. $^1\text{H}$ NMR spectrum of $\text{PTh}_{80}\text{-}b\text{-PTe}_{60}$ .....                                                 | S5  |
| Figure S4. GPC traces of block copolymer $\text{PTh}_{80}\text{-}b\text{-PTe}_{60}$ .....                                                | S6  |
| Figure S5. PTe Homopolymer Solid State Optical Absorption Spectrum .....                                                                 | S7  |
| Figure S6. UV-Vis-NIR of Oxidized $\text{PTh}_{80}\text{-}b\text{-PTe}_{60}$ . .....                                                     | S8  |
| Figure S7. STEM of Partially Aggregated $\text{PTh}_{80}\text{-}b\text{-PTe}_{60}$ .....                                                 | S9  |
| Figure S8. TEM of Oxidized $\text{PTh}_{80}\text{-}b\text{-PTe}_{60}$ .....                                                              | S10 |
| Figure S9. Oxidized $\text{PTh}_{80}\text{-}b\text{-PTe}_{60}$ Micelle Widths measured by AFM .....                                      | S11 |
| Figure S10. $\text{PTh}_{80}\text{-}b\text{-PTe}_{60}$ 15 min after $\text{FeTs}_3$ addition .....                                       | S12 |
| Figure S11. Size Distribution of Oxidized Micelles Aged for 2 months .....                                                               | S13 |
| Figure S12. STEM of Oxidized Micelles Aged for 2 months .....                                                                            | S14 |
| Figure S13. WAXS of Partially Aggregated (blue) and Oxidized $\text{PTh}_{80}\text{-}b\text{-PTe}_{60}$<br>(red) samples. ....           | S15 |
| Figure S14. UV-Vis-NIR Spectroscopy of Oxidized (red trace) and Reduced $\text{PTh}_{80}\text{-}b\text{-PTe}_{60}$<br>(blue trace). .... | S16 |
| S1. Work Function Calculation for Oxidatively Doped PTe Films .....                                                                      | S17 |
| Table S1. Differences in work function and conductivities of PTe thin films dip-<br>doped with $\text{FeTs}_3$ .....                     | S18 |
| References .....                                                                                                                         | S18 |

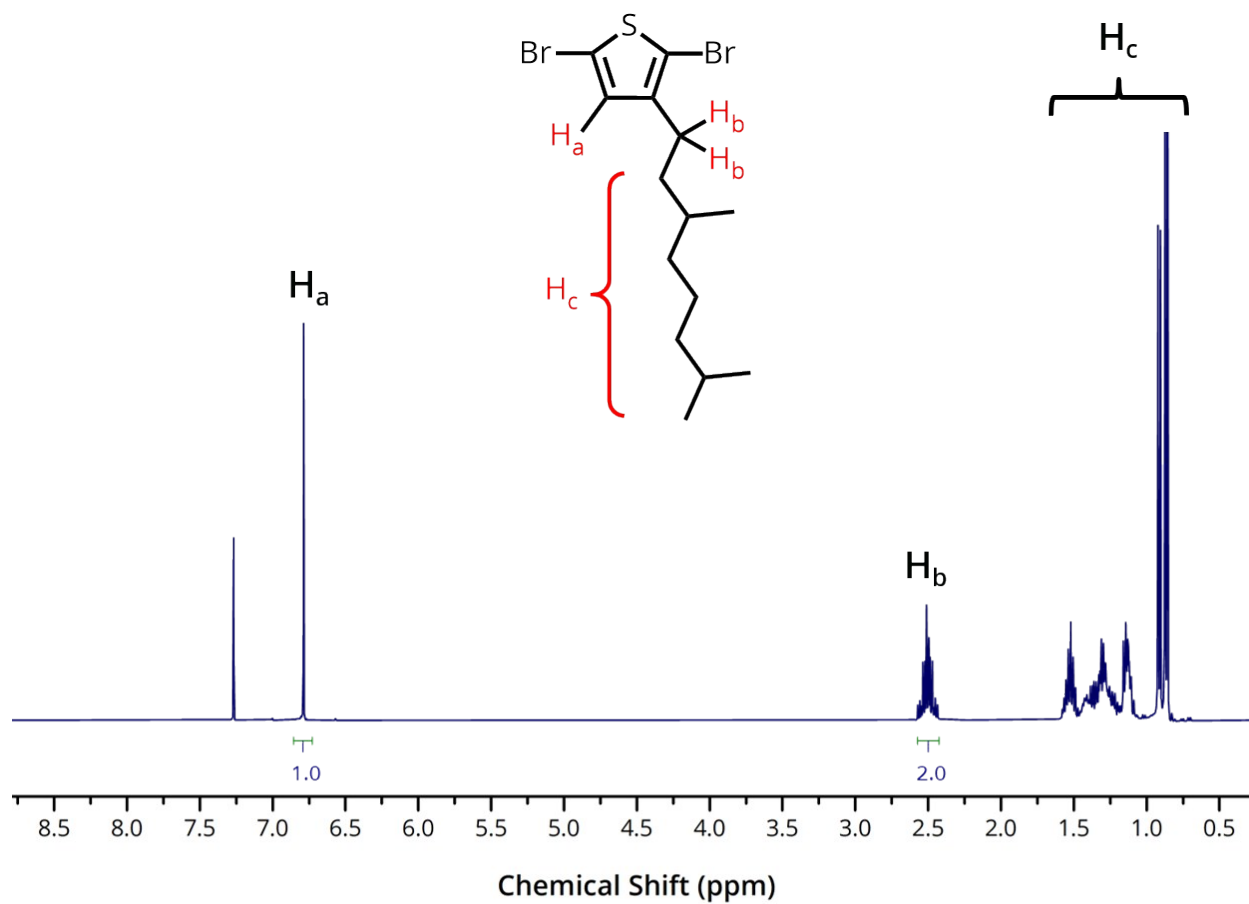

Figure S1.  $^1\text{H}$  NMR spectrum of Thiophene Monomer in  $\text{CDCl}_3$  at 25 °C, 500 MHz.

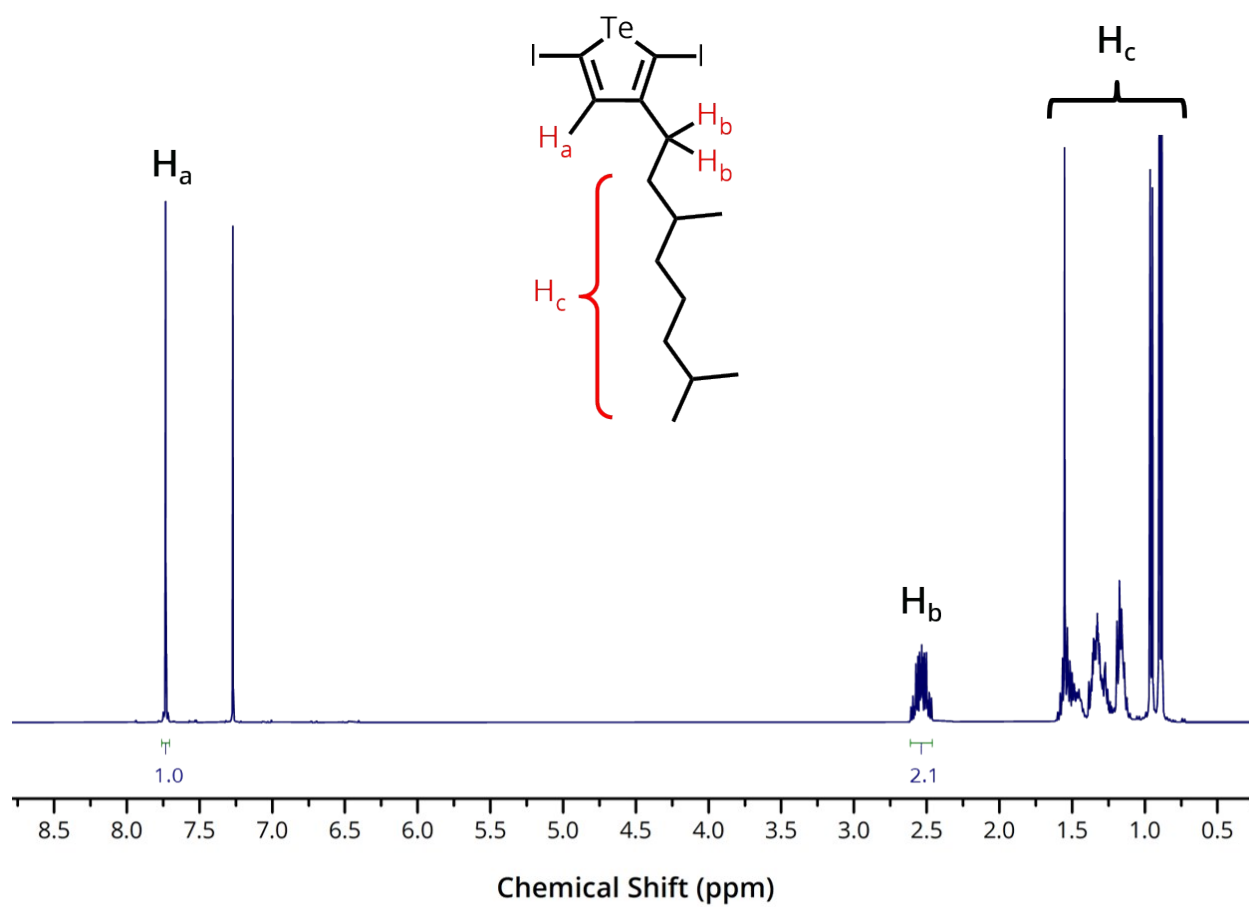

Figure S2.  $^1\text{H}$  NMR spectrum of Tellurophene Monomer in  $\text{CDCl}_3$  at  $25^\circ\text{C}$ , 500 MHz.

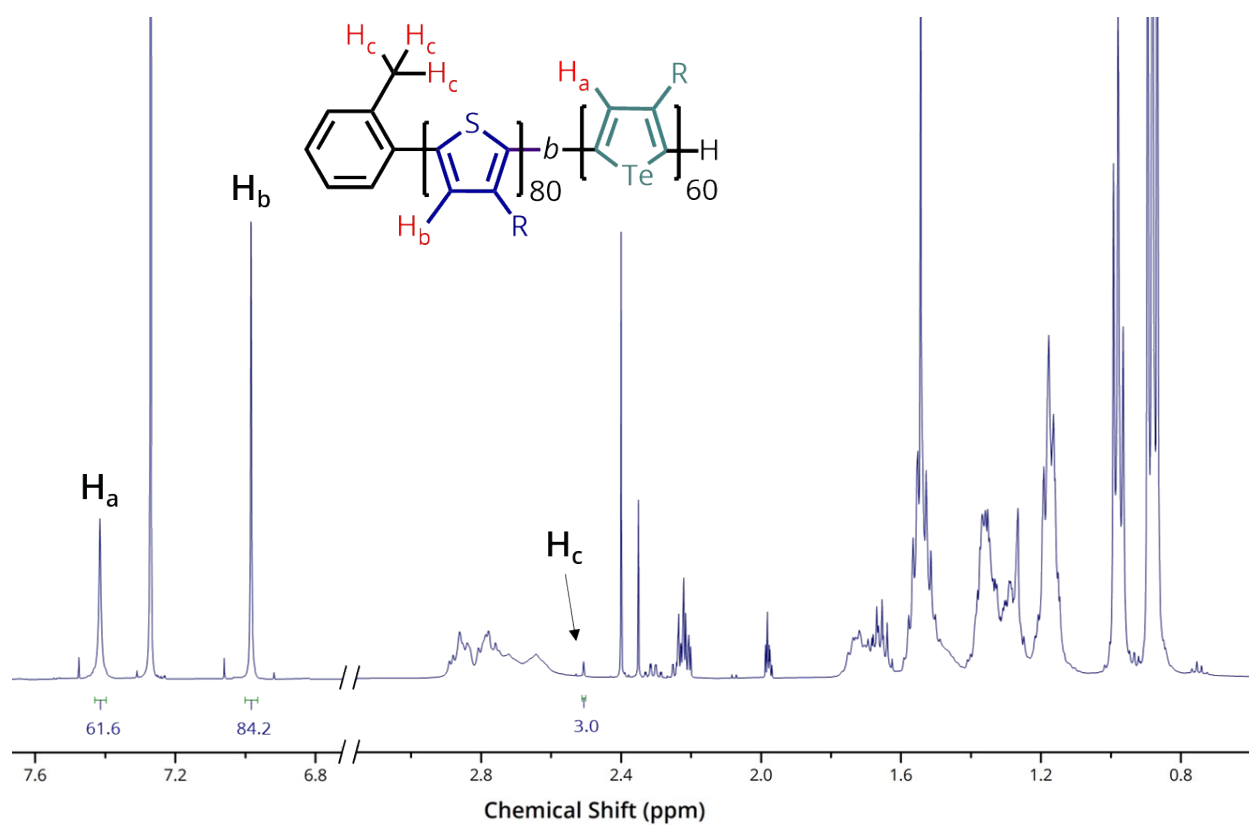

Figure S3.  $^1\text{H}$  NMR spectrum of  $\text{PTh}_{80}\text{-}b\text{-PTe}_{60}$  in  $\text{CDCl}_3$  at  $25\text{ }^\circ\text{C}$ ,  $500\text{ MHz}$ .

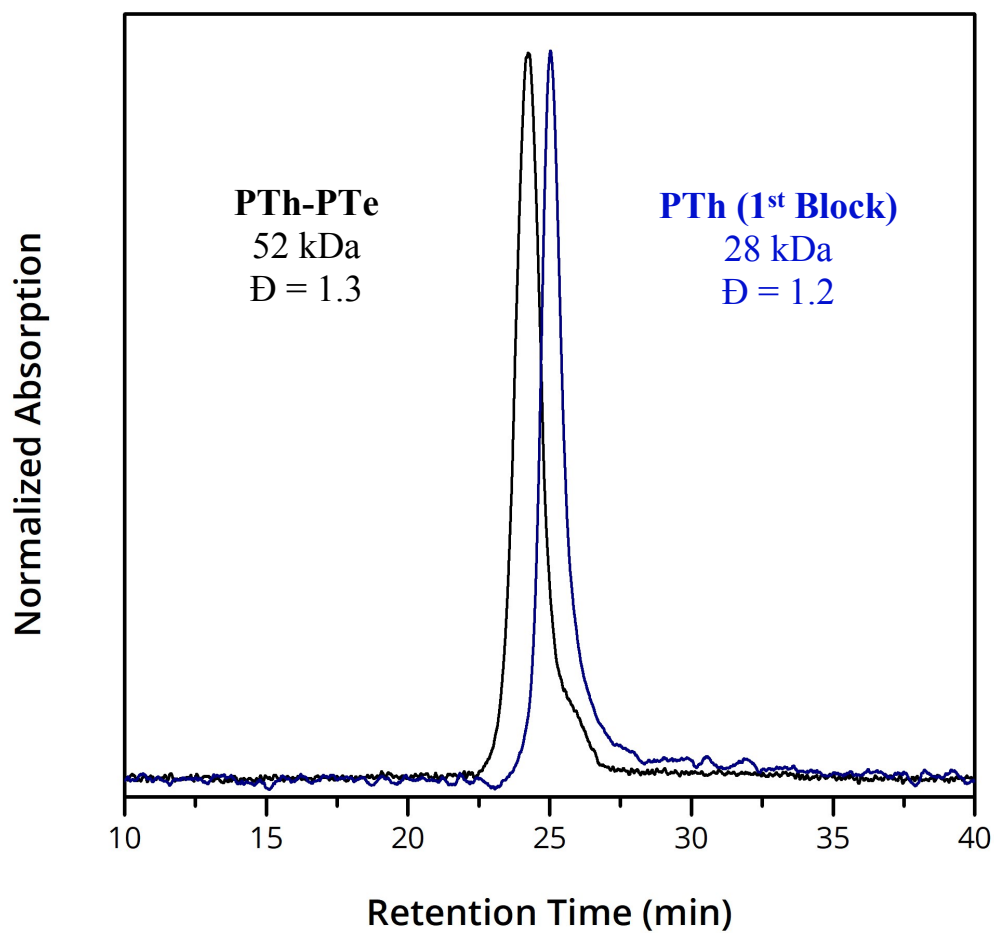

Figure S4. GPC traces of block copolymer PTh<sub>80</sub>-*b*-PTe<sub>60</sub>.  $M_n$  overestimation by a factor of 1.2 is typical due to the rigidity of polymer semiconductors relative to polystyrene standards.<sup>1</sup>

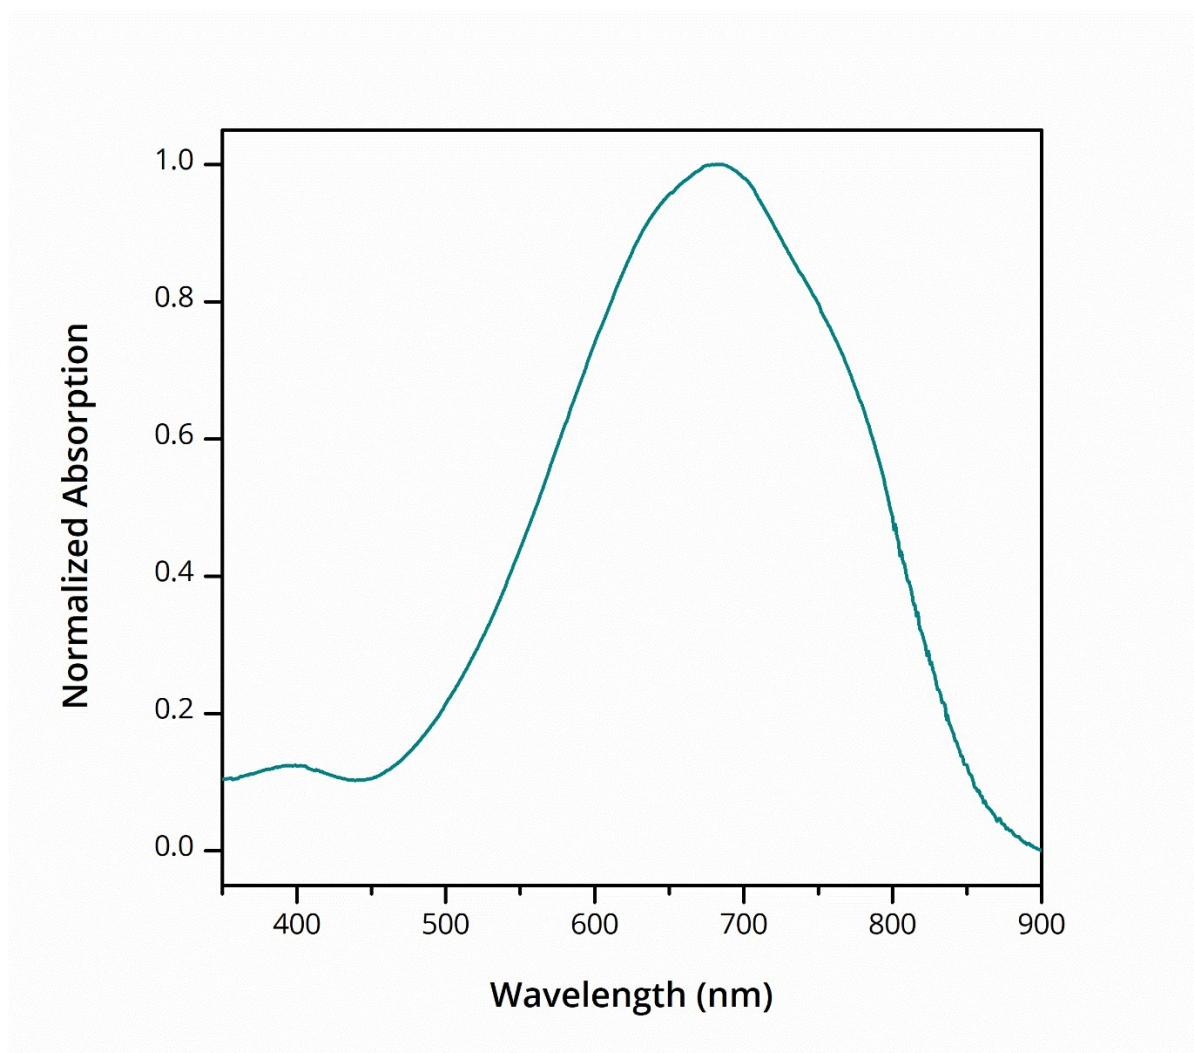

Figure S5. PTe Homopolymer Solid State Optical Absorption Spectrum

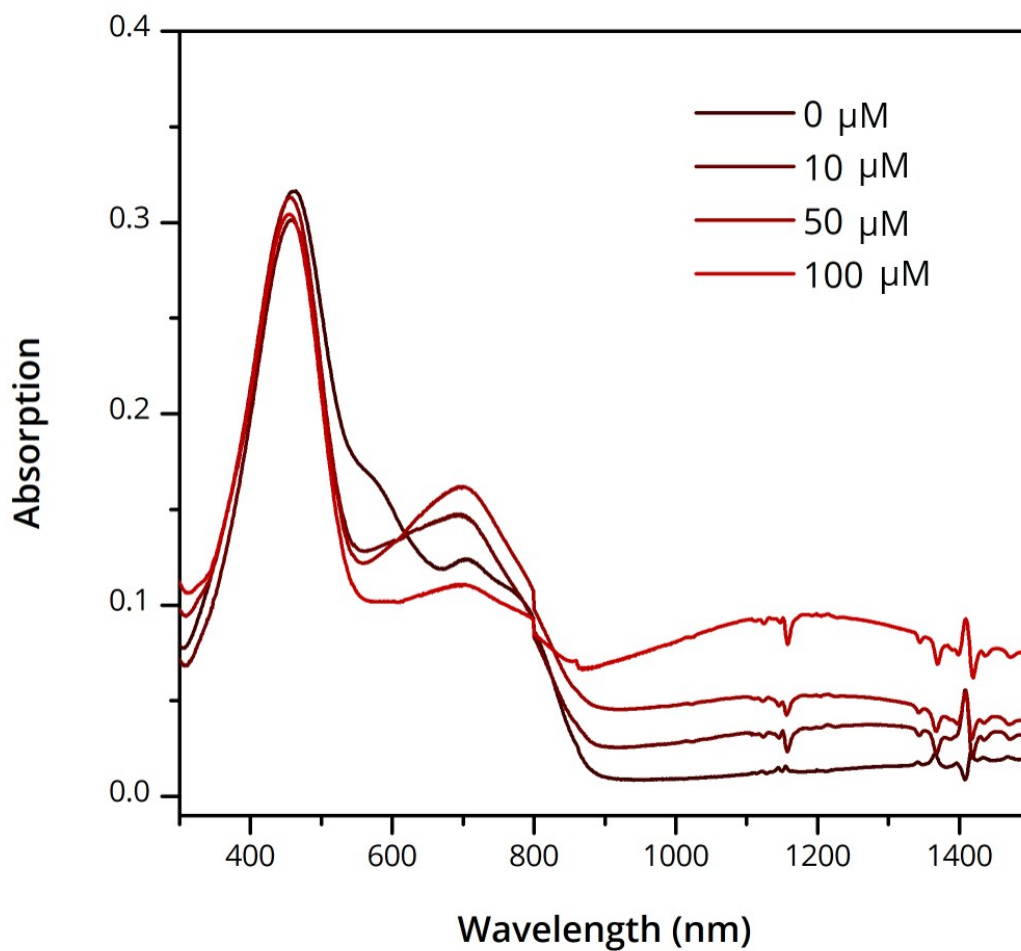

Figure S6. UV-Vis-NIR of Oxidized PTh<sub>80</sub>-*b*-PTe<sub>60</sub>. UV-Vis-NIR of PTh<sub>80</sub>-*b*-PTe<sub>60</sub> with different concentrations of FeTs<sub>3</sub>. All samples prepared at 0.05 mg/mL in 95 % DCM, 5 % chloroform.



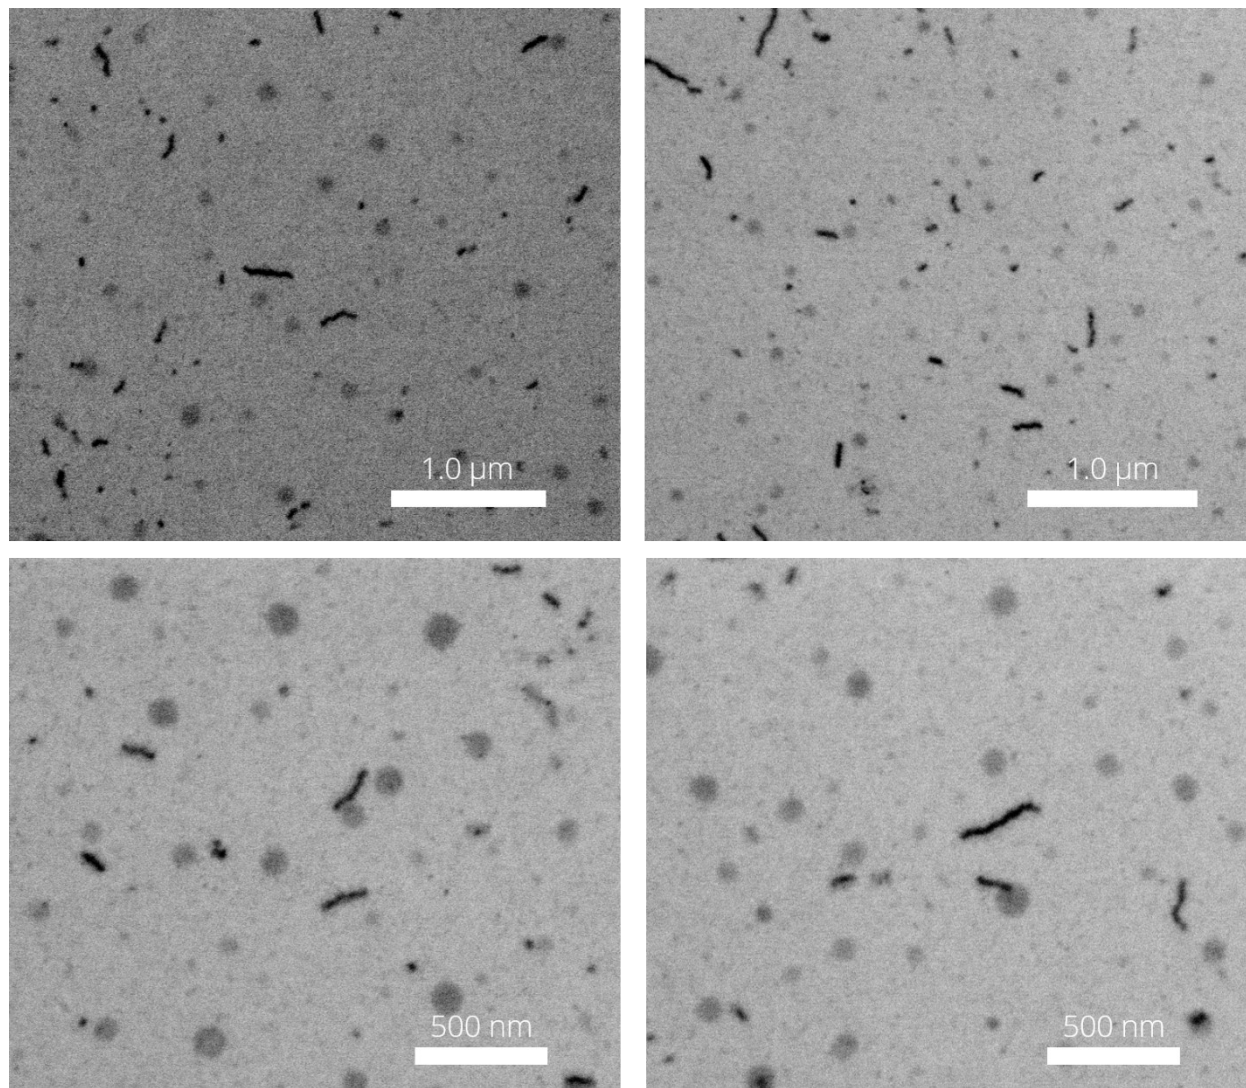

Figure S7. STEM of Partially Aggregated PTh<sub>80</sub>-*b*-PTe<sub>60</sub>. Partially aggregated PTh<sub>80</sub>-*b*-PTe<sub>60</sub> drop-cast onto a carbon film with Cu support grid. STEM utilized to improve the visualization of low contrast unimer film, which appear as amorphous, circular features.

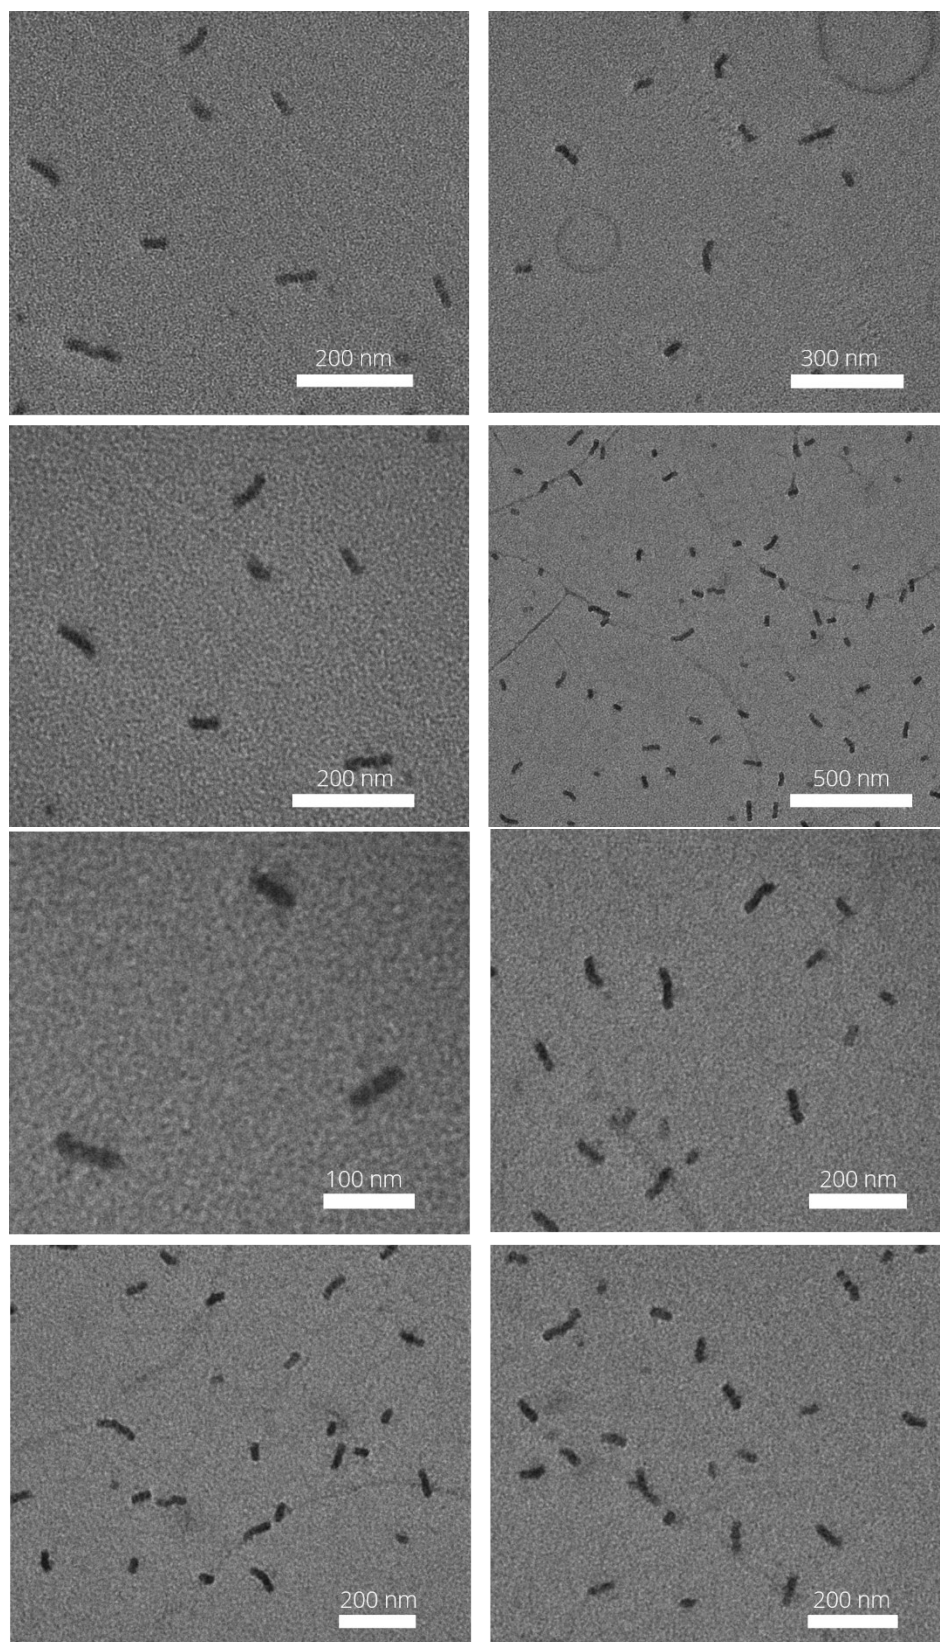

Figure S8. TEM of Oxidized PTh<sub>80</sub>-*b*-PTe<sub>60</sub>

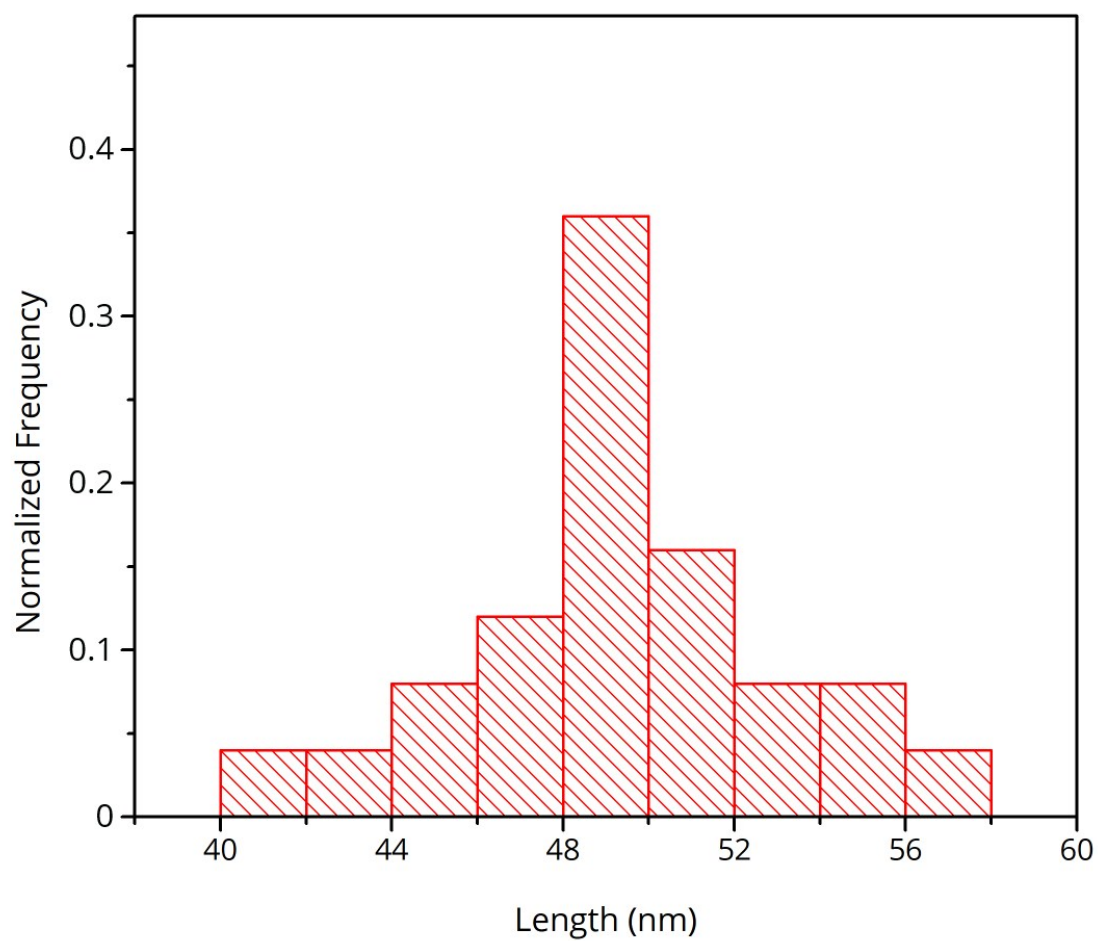

Figure S9. Oxidized PTh<sub>80</sub>-*b*-PTe<sub>60</sub> Micelle Widths measured by AFM

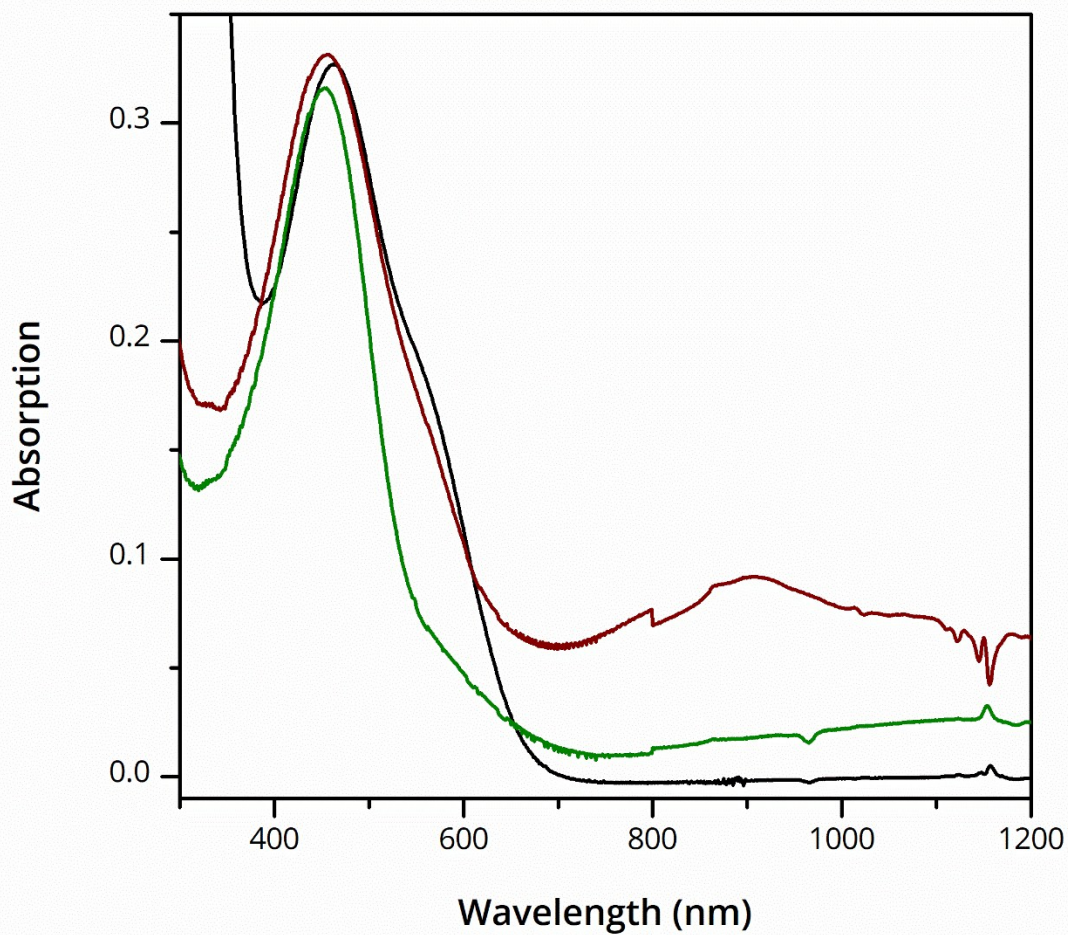

Figure S10. PTh<sub>80</sub>-b-PTe<sub>60</sub> 15 min after FeTs<sub>3</sub> addition in chloroform (green) and 95 % DCM, 5 % chloroform (red). Solvated PTh<sub>80</sub>-b-PTe<sub>60</sub> shown for reference (black).

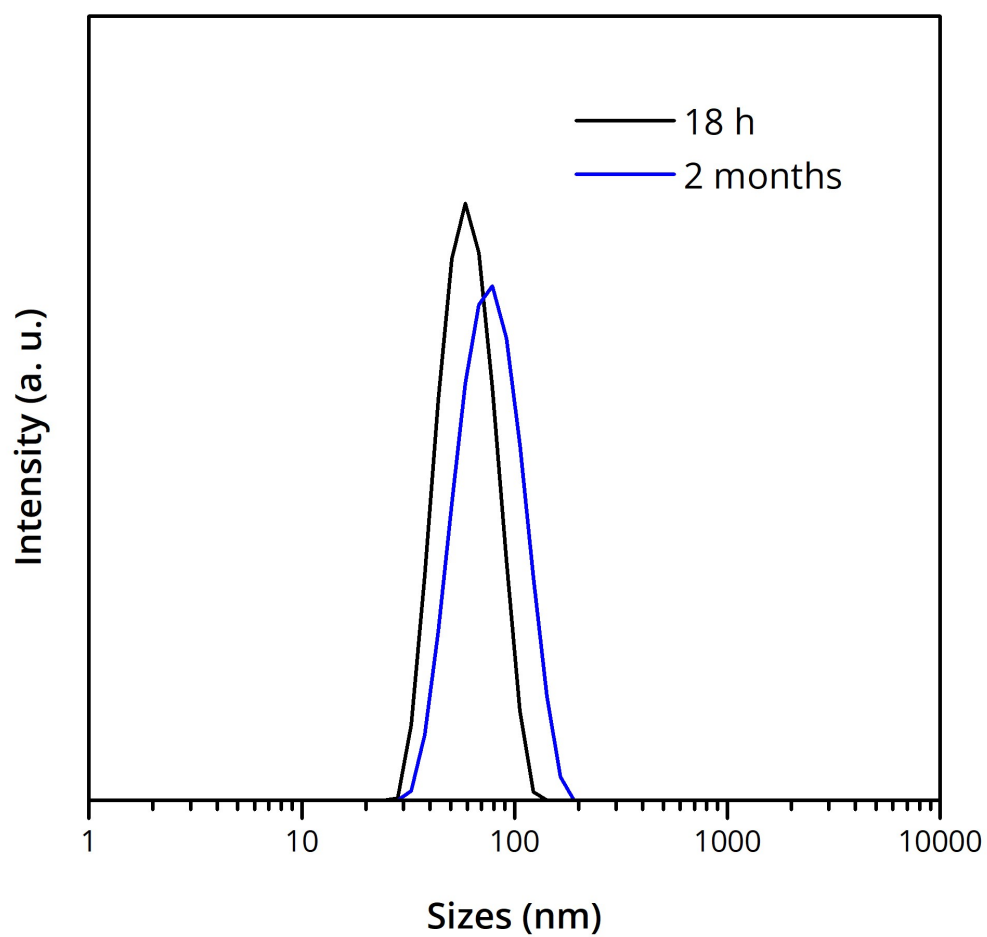

Figure S11. Size Distribution of Oxidized Micelles Aged for 2 months



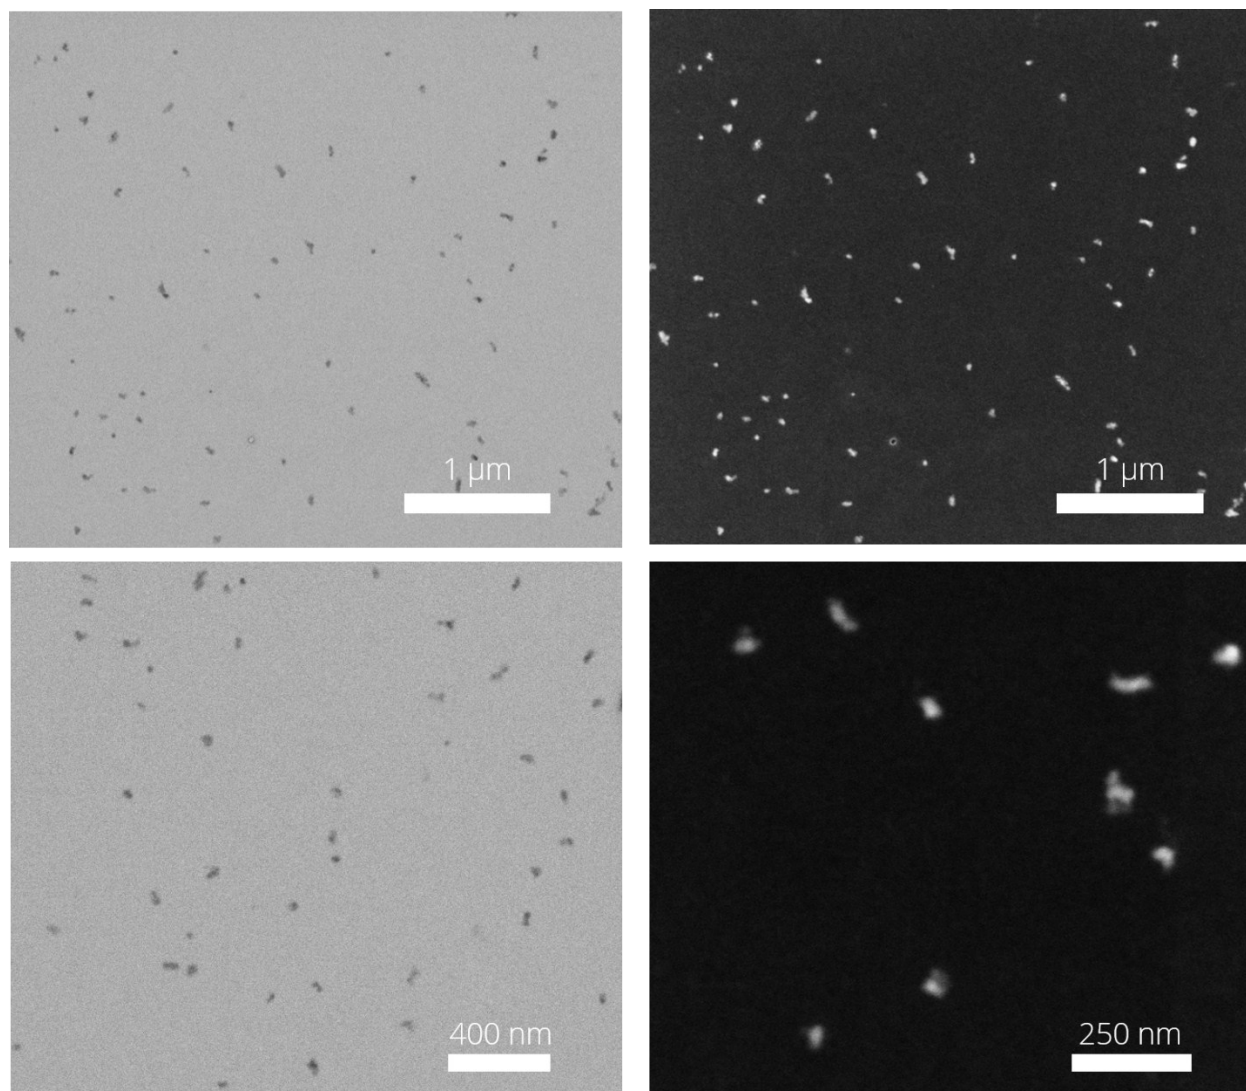

Figure S12. STEM of Oxidized Micelles Aged for 2 months. Oxidized micelles drop cast onto carbon film with Cu support grid after aging for 2 months. Bright field (left) and dark field (right) modes of STEM were used to visualize the sample, showing only oxidized micelles unchanged with aging.

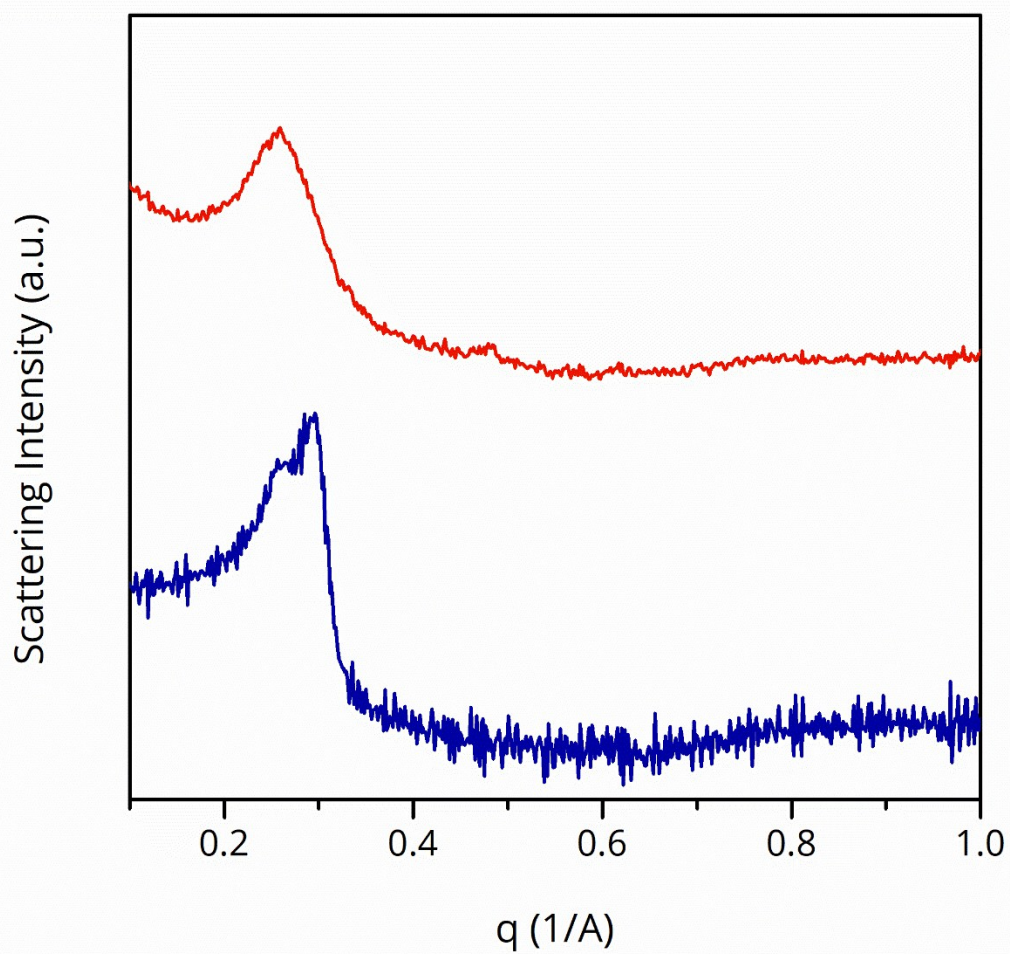

Figure S13. WAXS of Partially Aggregated (blue) and Oxidized PTh<sub>80</sub>-b-PTe<sub>60</sub> (red) samples.

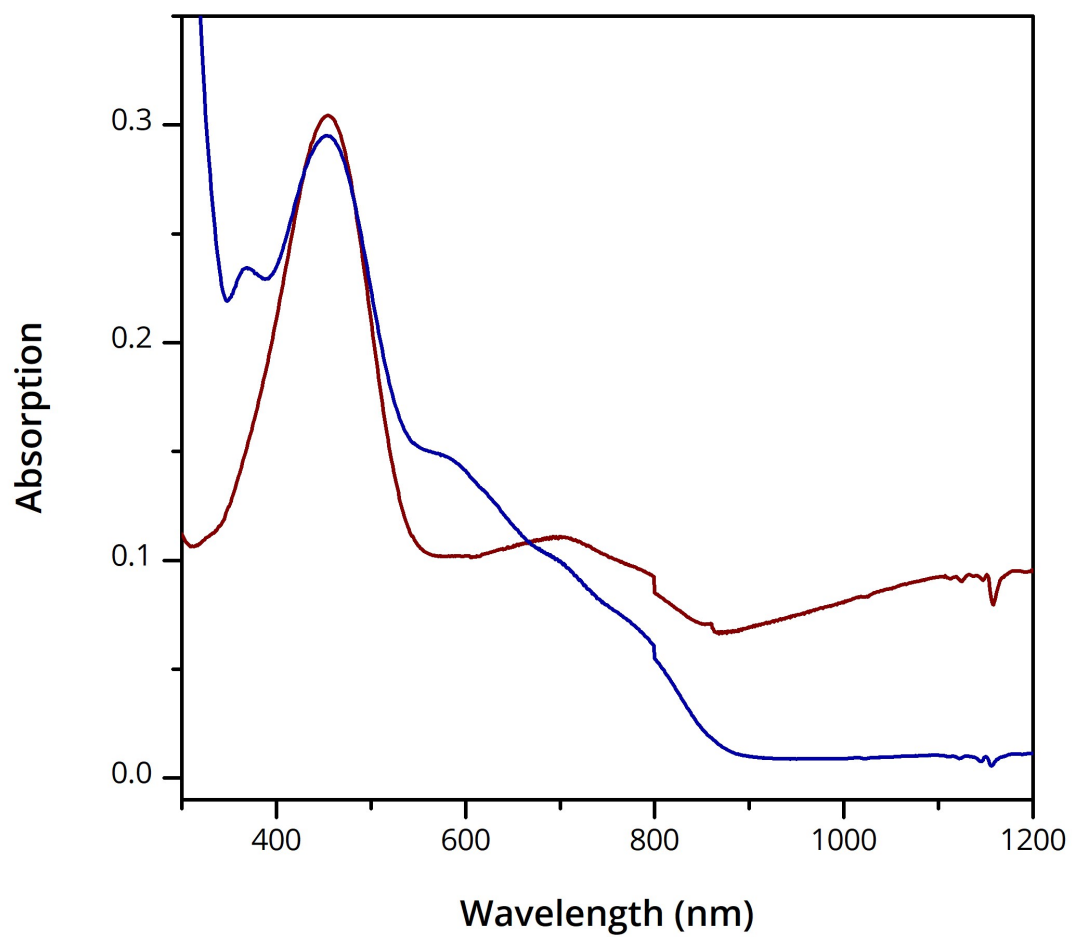

Figure S14. UV-Vis-NIR Spectroscopy of Oxidized (red trace) and Reduced PTh<sub>80</sub>-*b*-PTe<sub>60</sub> (blue trace).



## S1. Work Function Calculation for Oxidatively Doped PTe Films

Difference in work function ( $\Delta\phi$ ) is an average of three measurements at different locations over two films. Films were scratched to expose the ITO to measure the contact potential difference (CPD) across the film surface and the CPD of the ITO surface using Kelvin probe force microscopy (KPFM).  $\Delta\phi$  is calculated using the equations below where  $e$  is elementary charge.

$$\Delta\phi = \phi_{doped\ film} - \phi_{pristine\ film}$$

where

$$CPD_{film} = \frac{\phi_{film} - \phi_{tip}}{e}$$

It should be noted that the CPD of the film is the relative difference of the CPD between the film surface and the CPD of the ITO surface. This difference is largely unaffected between measurements. Measuring the film surface without an ITO reference typically results in large differences in the CPDs of the film when measuring the same sample multiple times or when using different KPFM tips. Referencing the CPD of the film to the CPD of ITO eliminates this variability.

| Concentration<br>(mM) | Difference in Work<br>Function<br>(meV) | Conductivity<br>(S cm <sup>-1</sup> ) |
|-----------------------|-----------------------------------------|---------------------------------------|
| 1                     | 240 ± 50                                | 8.7 ± 3.4 <sup>2</sup>                |
| 5                     | 340 ± 50                                | 6.0 ± 0.6 <sup>2</sup>                |
| 10                    | 400 ± 40                                | 1.4 ± 0.4 <sup>2</sup>                |

Table S1. Differences in work function and conductivities of PTh<sub>80</sub>-*b*-PTe<sub>60</sub> thin films dip-doped with FeTs<sub>3</sub>

## References

- 1 J. Liu, R. S. Loewe and R. D. McCullough, Employing MALDI-MS on Poly(alkylthiophenes): Analysis of Molecular Weights, Molecular Weight Distributions, End-Group Structures, and End-Group Modifications, *Macromolecules*, 1999, **32**, 5777–5785.
- 2 J. R. Panchuk, A. W. Laramée, J. G. Manion, S. Ye and D. S. Seferos, Heavy atom substitution — A strategy for improving conductivity in conjugated polymers, *Synth. Met.*, 2019, **253**, 57–61.
